# Supplementary material
Source: PubMed Central journal article supplement (PMC4456038)
Supplement: NIHMS689414-supplement-6.pdf [file NIHMS689414-supplement-6.pdf]

## Supplementary Information for:

### Generalized Adaptive Intelligent Binning of Multiway Data

Bradley Worley and Robert Powers\*

*Department of Chemistry, University of Nebraska-Lincoln, Lincoln, NE 68588-0304*

#### TABLE OF CONTENTS

**Figure S-1.** Processed HSQC mean spectrum of the fibroblast data tensor with overlaid uniform and GAI bin boundaries.

**Figure S-2.** Permutation significant test results from OPLS-DA models of uniformly binned HSQC spectral data.

**Figure S-3.** Permutation significant test results from OPLS-DA models of GAI-binned HSQC spectral data.

**Figure S-4.** Permutation significant test results from OPLS-DA models of uniformly compressed HSQC spectral data.

**Figure S-5.** Permutation significant test results from OPLS-DA models of GAI-compressed HSQC spectral data.

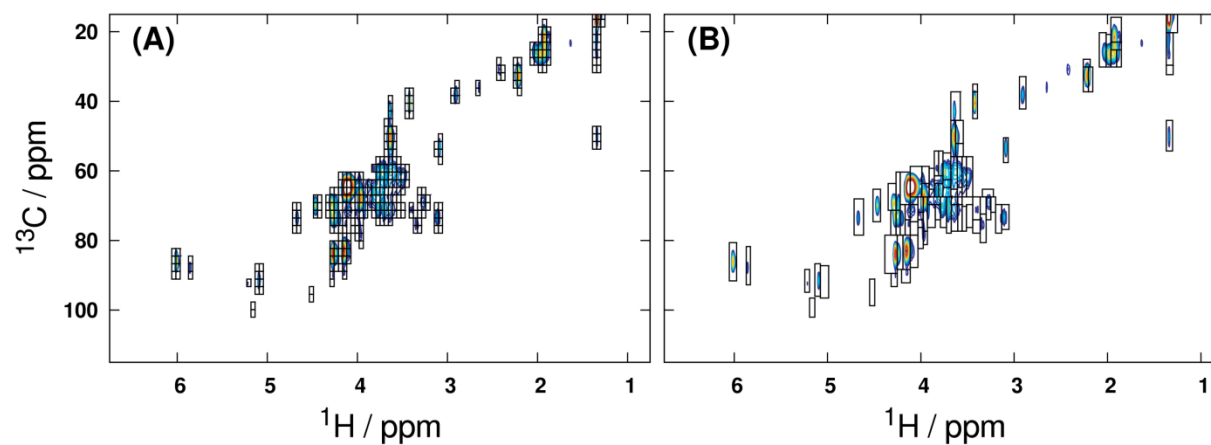

**Figure S-1.** Processed  $^1\text{H}$ - $^{13}\text{C}$  HSQC mean spectrum of the fibroblast data tensor, with overlaid uniform (A) and GAI (B) bin boundaries. The dataset was binned with minimum bin widths along  $^1\text{H}$  and  $^{13}\text{C}$  of 0.025 ppm and 2.5 ppm, respectively. Retained bins all have maximum intensities no less than three times the standard deviation of the noise floor.

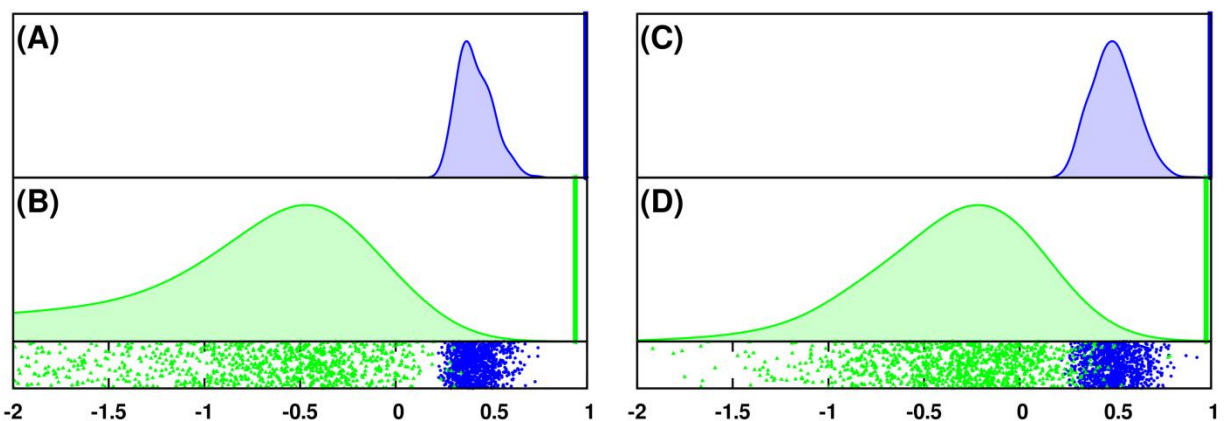

**Figure S-2.** Response permutation test results for OPLS-DA models of the uniformly binned (integrated) liver (**A, B**) and the fibroblast (**C, D**) data tensors. Model fit ( $R^2_Y$ ) statistics (**A, C**) are shown in blue, and model predictive ability ( $Q^2$ ) statistics (**B, D**) are shown in green. True values of  $R^2_Y$  and  $Q^2$  are represented by vertical bars, and null distributions are computed through kernel density estimation of the values from permutation. Scatter plots of the permutation  $R^2_Y$  and  $Q^2$  statistics are shown in the lower panes.

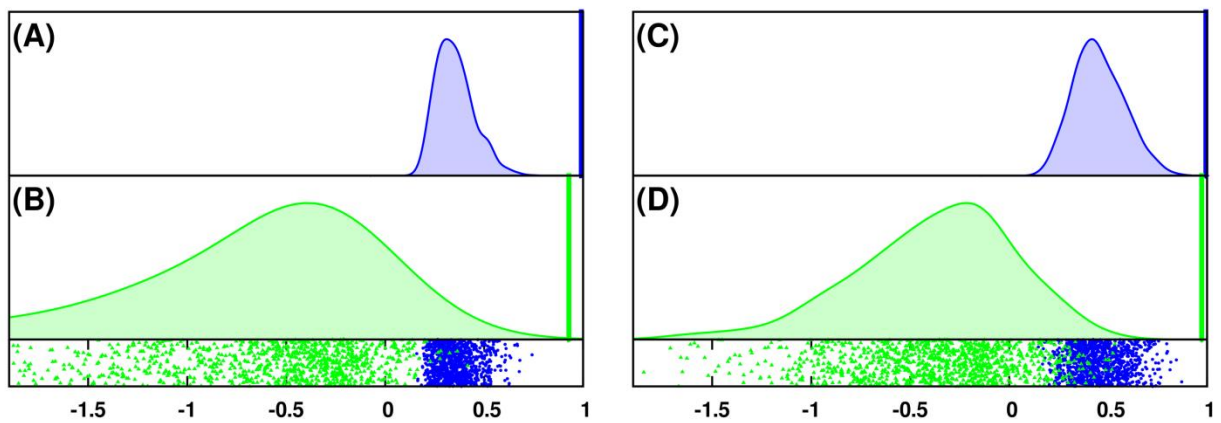

**Figure S-3.** Response permutation test results for OPLS-DA models of the GAI-binned (integrated) liver (**A, B**) and the fibroblast (**C, D**) data tensors. See the caption of Figure S-2 for a complete description of the figure contents.

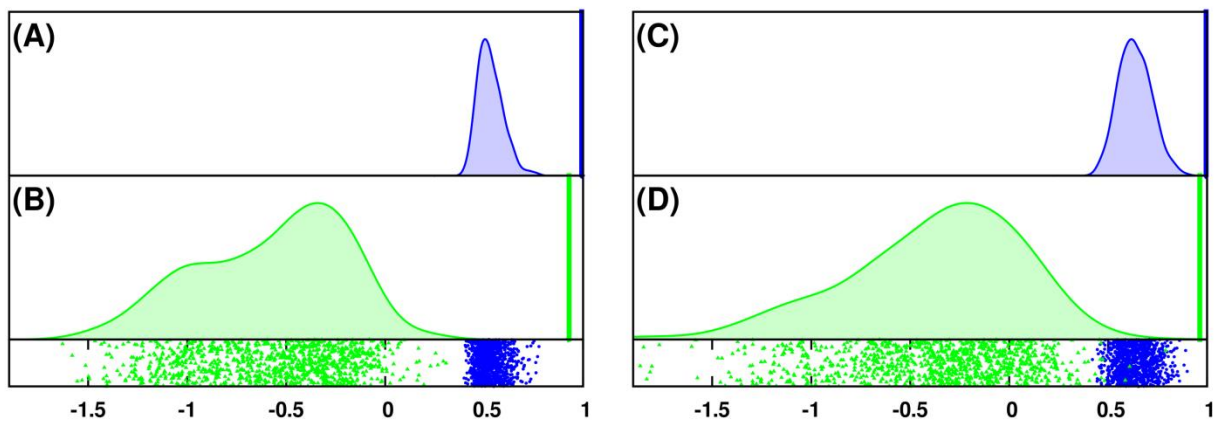

**Figure S-4.** Response permutation test results for OPLS-DA models of the uniformly binned (vectorized) liver (**A, B**) and the fibroblast (**C, D**) data tensors. See the caption of Figure S-2 for a complete description of the figure contents.

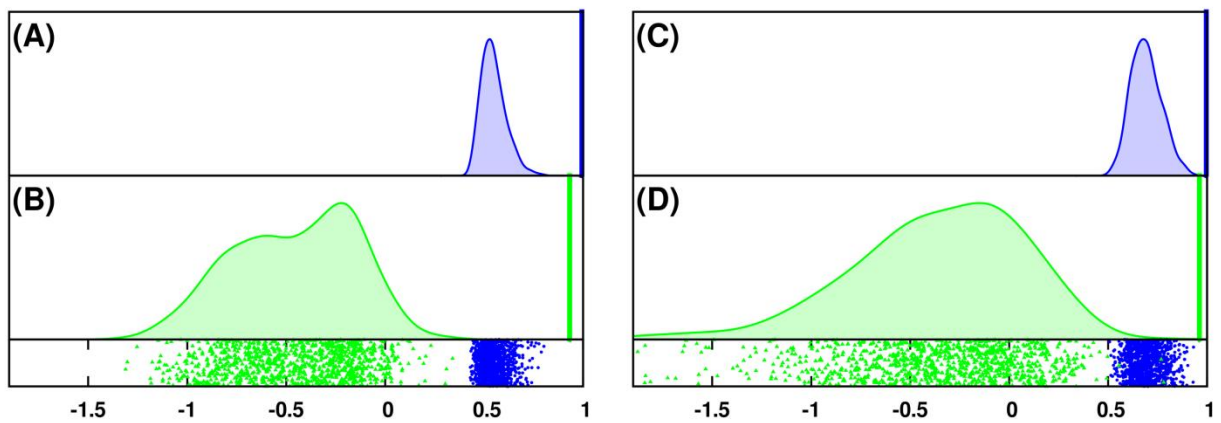

**Figure S-5.** Response permutation test results for OPLS-DA models of the GAI-binned (vectorized) liver (**A, B**) and the fibroblast (**C, D**) data tensors. See the caption of Figure S-2 for a complete description of the figure contents.
